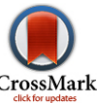

## Correction

# Correction: *In Vivo* Substrates of the Lens Molecular Chaperones $\alpha$ A-Crystallin and $\alpha$ B-Crystallin

The PLOS ONE Staff

## Notice of Republication

This paper was republished on June 10, 2014, to include File S1, which was mistakenly omitted from the original publication; the publisher apologizes for the error. In addition, in the last sentence of the Two-week Old aA-R49C Mouse Lenses section, “Spots 5466” was changed to “Spots 5446.”

Please download this article again to view the correct version. The originally published, uncorrected article and the republished, corrected article are provided here for reference.

## Supporting Information

**File S1.** Originally published, uncorrected article.  
(PDF)

**File S2.** Republished, corrected article.  
(PDF)

## Reference

1. Andley UP, Malone JP, Townsend RR (2014) *In Vivo* Substrates of the Lens Molecular Chaperones  $\alpha$ A-Crystallin and  $\alpha$ B-Crystallin. PLoS ONE 9(4): e95507. doi:10.1371/journal.pone.0095507.

**Citation:** The PLOS ONE Staff (2014) Correction: *In Vivo* Substrates of the Lens Molecular Chaperones  $\alpha$ A-Crystallin and  $\alpha$ B-Crystallin. PLoS ONE 9(7): e102210. doi:10.1371/journal.pone.0102210

**Published:** July 1, 2014

**Copyright:** © 2014 The PLOS ONE Staff. This is an open-access article distributed under the terms of the Creative Commons Attribution License, which permits unrestricted use, distribution, and reproduction in any medium, provided the original author and source are credited.
